# Supplementary material
Source: publisher figshare collection journal article supplement (https://acs.figshare.com/ndownloader/files/4159060)
Supplement: Supplementary file 1 [file 4159060]

# Screening and selective preparation of polymorphs by fast evaporation method: A case study of aspirin, anthranilic acid and niflumic acid

*Partha Pratim Bag and C. Malla Reddy\**

Department of Chemical Sciences, Indian Institute of Science Education and Research, Kolkata, 741252, India. Fax: +91 33 25873020; Tel: +91 33 25873118 (Ext. No: 238); E-mail: [cmallareddy@gmail.com](mailto:cmallareddy@gmail.com)

## **Experimental Method:**

**FT-IR Spectroscopy (KBr):** Fourier transmission infrared spectra of the solids were obtained using a Fourier-transform infrared spectrometer (PerkinElmer 502 or SHIMADZU FTIR-8400S). KBr samples (2 mg in 20 mg of KBr) were prepared and 5 scans were collected at 4 cm<sup>-1</sup> resolution for each sample. The spectra were measured over the range of 4000-400 cm<sup>-1</sup>.

**Powder X-Ray Diffraction (PXRD):** The PXRD patterns were collected on a Rigaku SmartLab with a Cu K $\alpha$  radiation (1.540 Å). The tube voltage and amperage were set at 40 kV and 50 mA respectively. Each sample was scanned between 5 and 50° 2 $\theta$  with a step size of 0.02°. The instrument was previously calibrated using a silicon standard.

**Differential Scanning Calorimetry (DSC):** DSC was conducted on a Mettler-Toledo DSC11 STAR<sup>®</sup> instrument. Accurately weighed samples (4-6 mg) were placed in hermetically sealed aluminium crucibles (40  $\mu$ L) and scanned in the range of 30 °C to 300 °C at a heating rate of 5 °C/min under a dry nitrogen atmosphere (flow rate 80 mL/min). The data were managed by STAR<sup>®</sup> software.

**Thermo Gravimetric Analysis:** TGA was performed on a Mettler-Toledo TGA/SDTA 851<sup>®</sup> instrument. Approximately 6-8 mg of the sample was added to an aluminium crucible and heated from 30 to 350 °C at a rate of 10 °C/min under continuous nitrogen purge.

**Table S1.** Conditions used at rotary evaporator for the preparation of aspirin (ASP) polymorphs. In all the milligram scale batches, 200 mg of ASP (1.1101 mmol; Sigma-Aldrich) was dissolved in suitable solvents (30-40 mL) for preparing the polymorphs. The weight of ASP used in the large scale batches was 2 gm (11.1014 mmol; in ca. 300-400 mL of solvent).

| <b>Solvent/No of attempts</b>   | <b>Pressure (mbar) (<math>\pm 5</math>)</b> | <b>Temperature of water bath (<math>^{\circ}\text{C}</math>) (<math>\pm 3</math>)</b> | <b>Revolution Speed of r.b. flask (rpm)</b> | <b>Polymorph Obtained</b> |
|---------------------------------|---------------------------------------------|---------------------------------------------------------------------------------------|---------------------------------------------|---------------------------|
| Acetone                         | 400                                         | 50                                                                                    | 130                                         | Form I                    |
| DCM                             | 800                                         | 50                                                                                    | 130                                         | Form I                    |
| CH <sub>3</sub> CN              | 180                                         | 50                                                                                    | 130                                         | Form I                    |
| MeOH                            | 300                                         | 50                                                                                    | 130                                         | Form I                    |
| EtOH                            | 250                                         | 50                                                                                    | 130                                         | Form I                    |
| THF                             | 250                                         | 50                                                                                    | 130                                         | Form I                    |
| Ether                           | 992                                         | 50                                                                                    | 130                                         | Form I                    |
| EA                              | 250                                         | 50                                                                                    | 130                                         | Form I                    |
| Isopropanol                     | 130                                         | 50                                                                                    | 130                                         | Form I                    |
| CH <sub>3</sub> NO <sub>2</sub> | 90                                          | 50                                                                                    | 130                                         | Form I                    |
| Acetone/1                       | 50                                          | <b>10</b>                                                                             | 130                                         | Form I                    |
| Acetone/2                       | 60                                          | <b>2</b>                                                                              | 130                                         | Form I                    |
| Acetone/3                       | 100                                         | <b>10</b>                                                                             | 130                                         | Form I                    |
| DCM/1                           | 125-70                                      | <b>10</b>                                                                             | 130                                         | Form II                   |
| DCM/2                           | 125-70                                      | <b>10</b>                                                                             | 130                                         | Form II                   |
| DCM/3                           | 125-70                                      | <b>10</b>                                                                             | 130                                         | Form II                   |
| DCM/4                           | 125-70                                      | <b>2</b>                                                                              | 130                                         | Form II                   |
| DCM/5                           | 125-70                                      | <b>2</b>                                                                              | 130                                         | Form II                   |
| Ether                           | 300                                         | <b>10</b>                                                                             | 130                                         | Form II                   |
| CH <sub>3</sub> CN              | 38                                          | <b>10</b>                                                                             | 130                                         | Form I                    |

|                                 |    |           |     |        |
|---------------------------------|----|-----------|-----|--------|
| MeOH                            | 45 | <b>10</b> | 130 | Form I |
| EtOH                            | 35 | <b>10</b> | 130 | Form I |
| THF                             | 70 | <b>10</b> | 130 | Form I |
| EA                              | 50 | <b>10</b> | 130 | Form I |
| Isopropanol                     | 50 | <b>10</b> | 130 | Form I |
| CH <sub>3</sub> NO <sub>2</sub> | 50 | <b>10</b> | 130 | Form I |

**Table S2.** Conditions used at rotary evaporator for the preparation of anthranilic acid (AA) polymorphs. In all the milligram scale batches, 400 mg of AA (0.2916 mmol; Sigma-Aldrich) was dissolved in suitable solvents (30-40 mL) for preparing the polymorphs. The weights of AA used in the large scale batches were 2 gm (14.5836 mmol; in ca. 300-400 mL of solvent) and 5 gm (36.459 mmol; in ca. 550 mL of solvent).

| <b>Solvent/No of attempts</b>   | <b>Pressure (mbar) (± 5)</b> | <b>Temperature of water bath (°C) (± 3)</b> | <b>Revolution Speed of r.b. flask (rpm)</b> | <b>Polymorph Obtained</b> |
|---------------------------------|------------------------------|---------------------------------------------|---------------------------------------------|---------------------------|
| H <sub>2</sub> O                | 100                          | 60                                          | 130-225                                     | Form I                    |
| DCM                             | 800                          | 50                                          | 130                                         | Form II                   |
| CH <sub>3</sub> CN              | 180-210                      | 50                                          | 130                                         | Form II                   |
| CHCl <sub>3</sub>               | 550                          | 50                                          | 130                                         | Form II                   |
| Isopropanol                     | 100                          | 50                                          | 130                                         | Form II                   |
| MeOH                            | 400                          | 50                                          | 130                                         | Form II                   |
| EtOH                            | 580                          | 50                                          | 130                                         | Form II                   |
| CH <sub>3</sub> NO <sub>2</sub> | 110-125                      | 50                                          | 130                                         | Form II                   |
| Dioxan                          | 90                           | 60                                          | 130                                         | Form II                   |
| DMF                             | 50-18                        | 70                                          | 130-200                                     | Form II                   |

**Table S3.** Conditions used at rotary evaporator for the preparation of niflumic acid (NFA) polymorphs. In all the batches 100 mg of NFA (0.5487 mmol; Sigma-Aldrich) was dissolved in suitable solvents (30–40 mL) for preparing the polymorphs.

| <b>Solvent/No of attempts</b>   | <b>Pressure (mbar) (<math>\pm 5</math>)</b> | <b>Temperature of water bath (<math>^{\circ}\text{C}</math>) (<math>\pm 3</math>)</b> | <b>Revolution Speed of r.b. flask (rpm)</b> | <b>Polymorph Obtained</b>   |
|---------------------------------|---------------------------------------------|---------------------------------------------------------------------------------------|---------------------------------------------|-----------------------------|
| MeOH                            | 300                                         | 50                                                                                    | 130                                         | Form I                      |
| CH <sub>3</sub> CN              | 180                                         | 50                                                                                    | 130                                         | Form I                      |
| THF                             | 250                                         | 50                                                                                    | 130                                         | Form I                      |
| Acetone                         | 400                                         | 50                                                                                    | 130                                         | Form I                      |
| CH <sub>3</sub> NO <sub>2</sub> | 90                                          | 50                                                                                    | 130                                         | Form I                      |
| EA                              | 250                                         | 50                                                                                    | 130                                         | Form I                      |
| DCM                             | 800                                         | 50                                                                                    | 130                                         | Form I                      |
| EtOH                            | 200                                         | 50                                                                                    | 130                                         | Form II                     |
| Isopropanol                     | 130                                         | 50                                                                                    | 130                                         | Mixture of Form I & Form II |

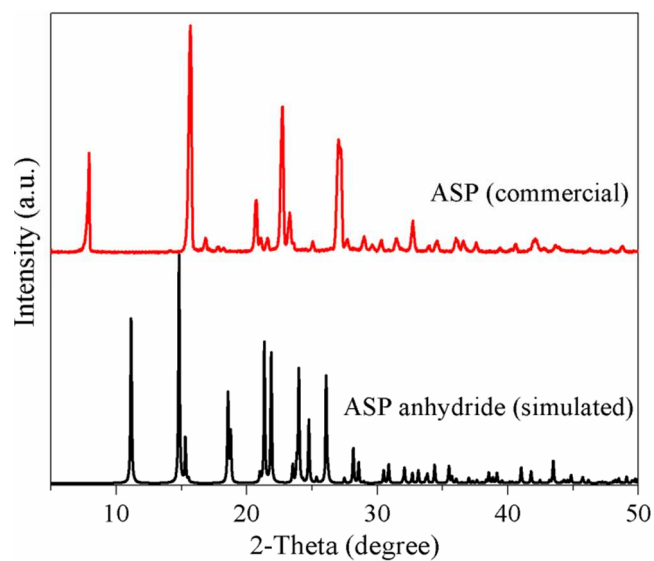

**Figure S1:** PXRD patterns of the simulated aspirin (ASP) anhydride and the commercial ASP (Aldrich). Note that the PXRD of the commercial ASP sample has no detectable ASP anhydride impurities (or far less than 1%).

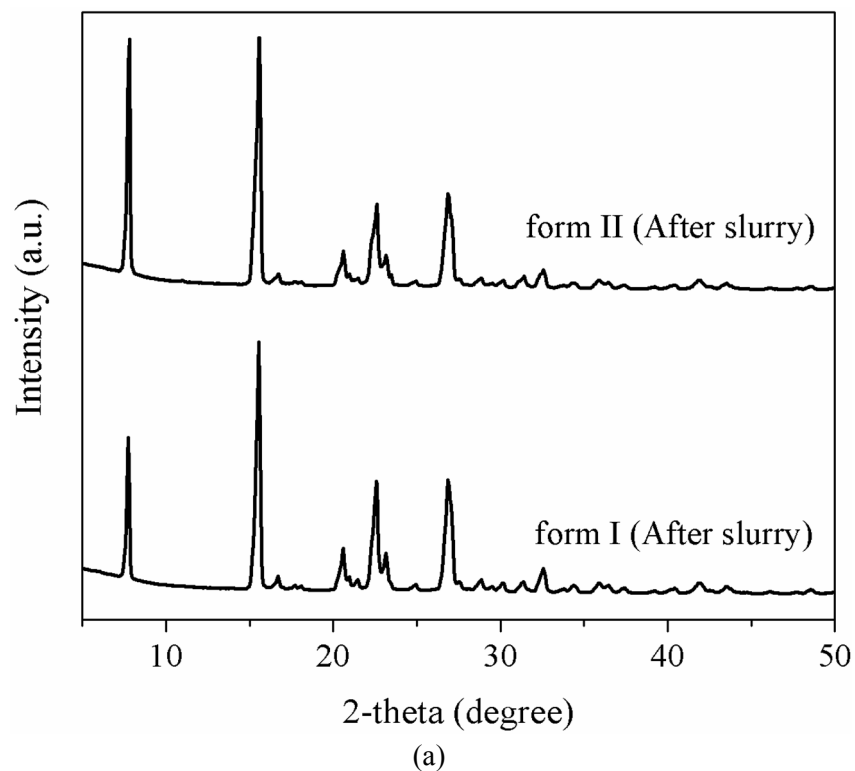

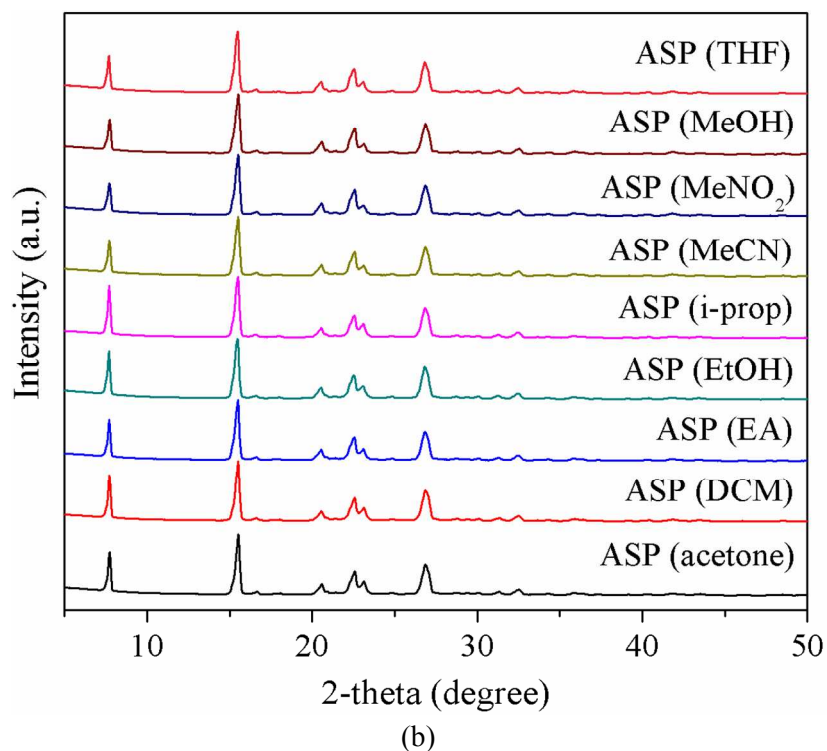

**Figure S2:** (a) PXRD patterns of the aspirin forms I and II after the slurry experiments (48 hr) from water in that the form II converts to form I, while the form I remains stable. This confirms the metastable nature of the form II. (b) PXRD patterns of the aspirin solids obtained from liquid assisted grinding (LAG) confirm the formation of only aspirin form I.

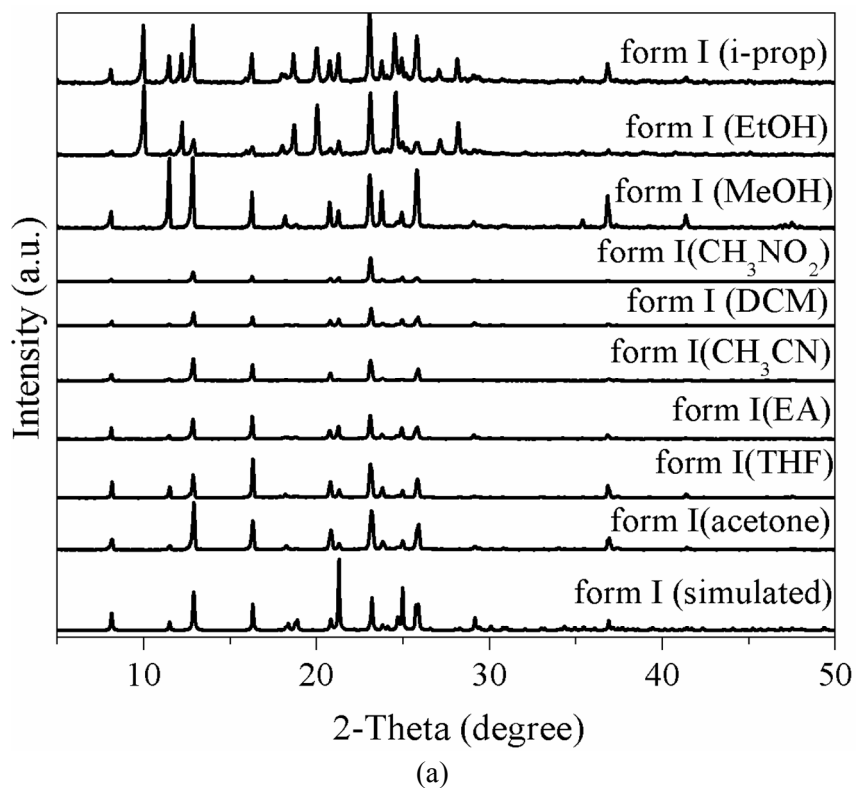

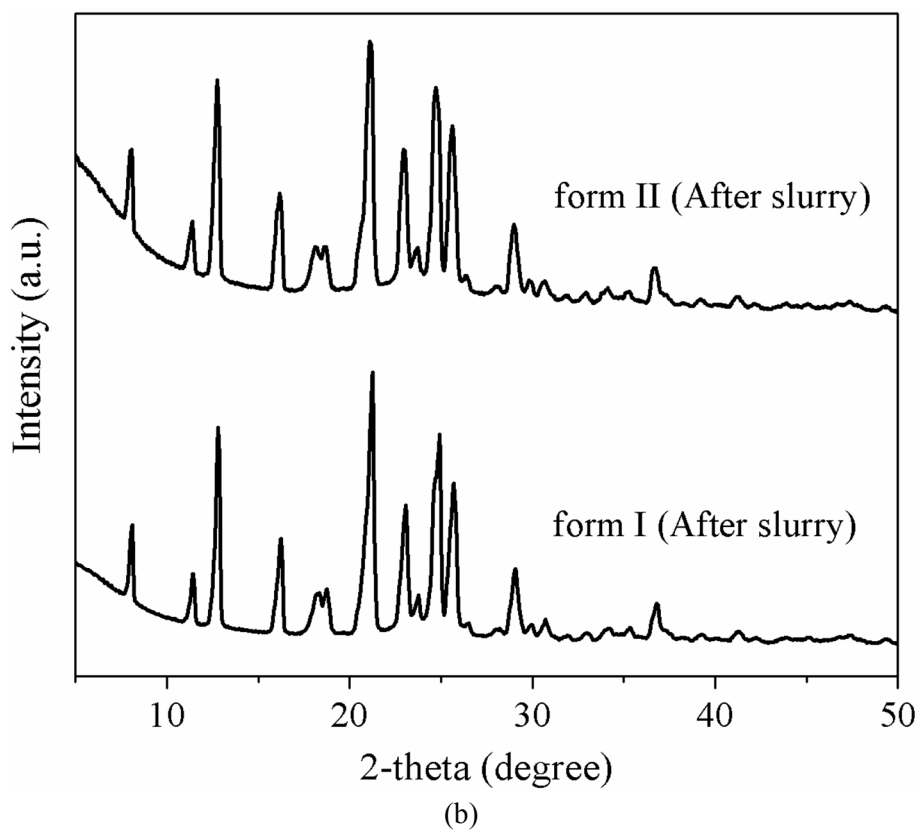

**Figure S3:** (a) PXRd patterns of the niflumic acid solids obtained by FE method from different solvents. The PXRd pattern of the new polymorph (Form II) obtained from EtOH is distinct from the known form I, obtained from the rest of the solvents. (b) PXRd patterns of the NFA, after slurry experiments to show the conversion of form II to form I, and unchanged form I.

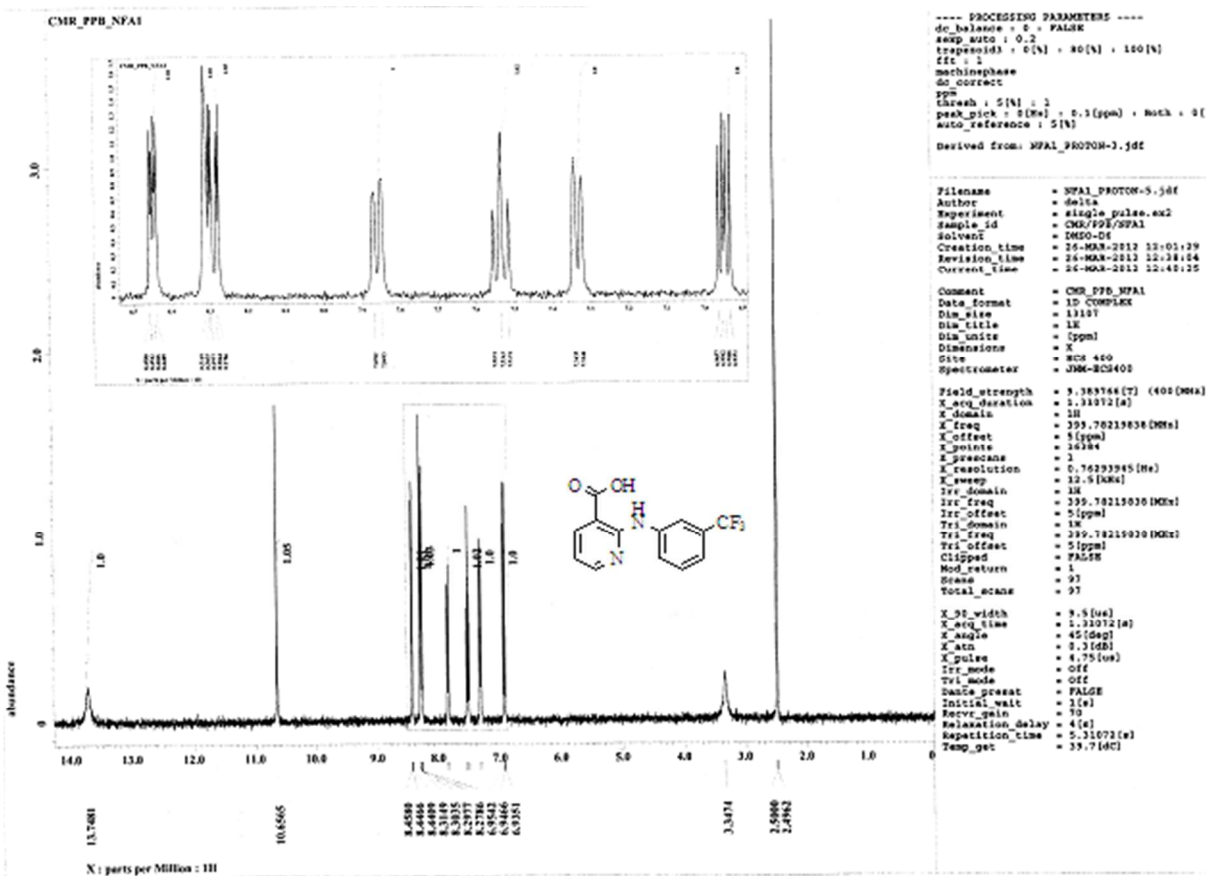

(a)

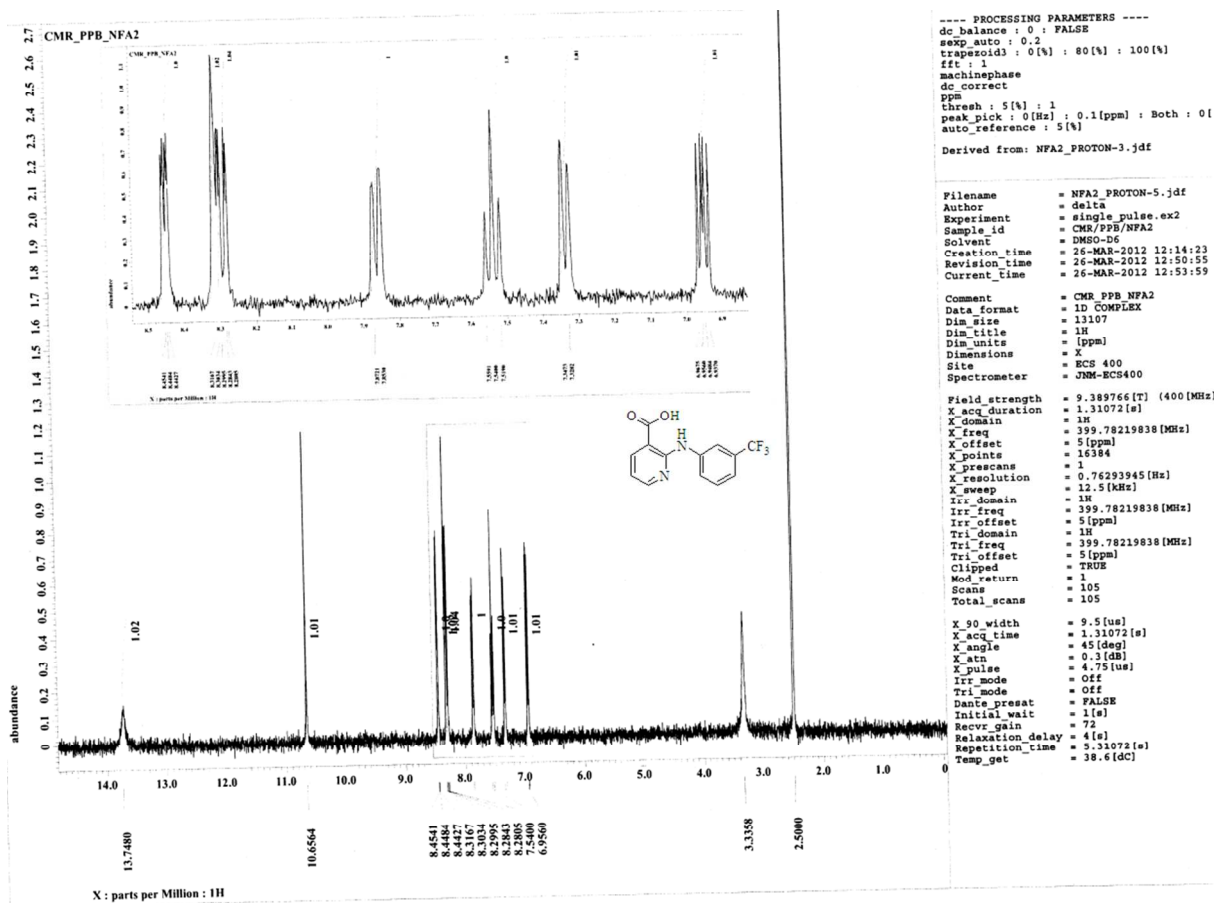

(b)

**Figure S4.**  $^1\text{H}$ -NMR from  $\text{DMSO-}d_6$  for niflumic acid (a) form I solid obtained from MeOH and (b) form II obtained from EtOH by FE method. Note that the  $^1\text{H}$ -NMR of the FE products show no chemical change to NFA, hence the distinct PXRD pattern of the solid from EtOH must be due to the formation of a new NFA solid form II.

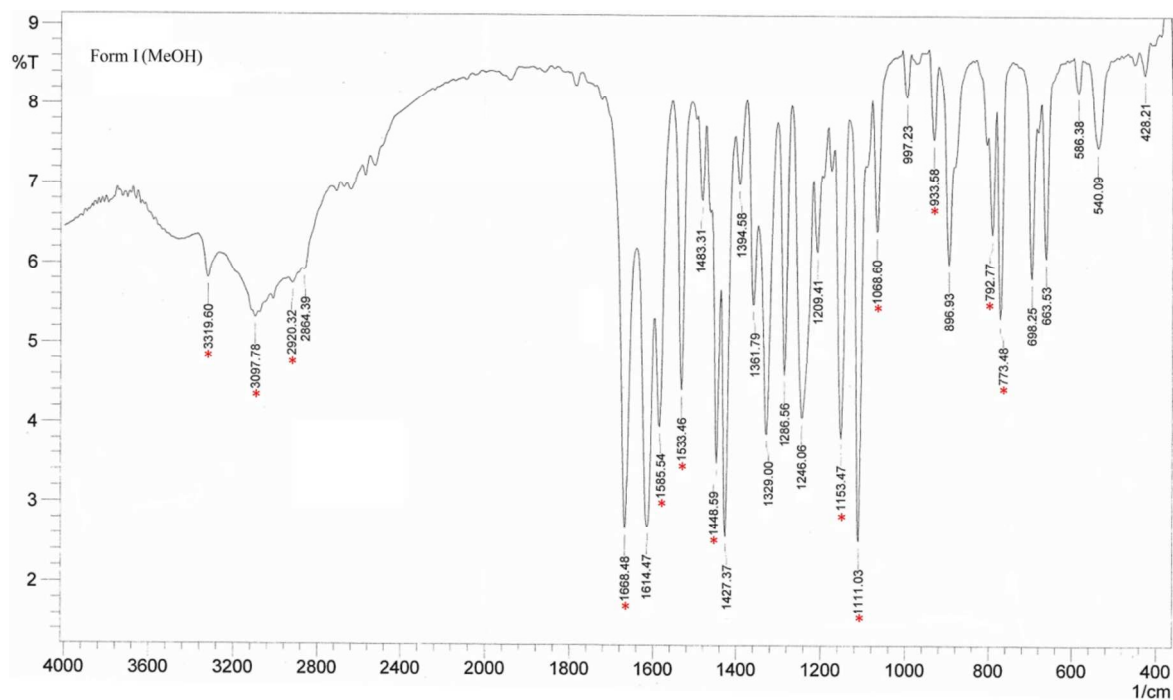

(a)

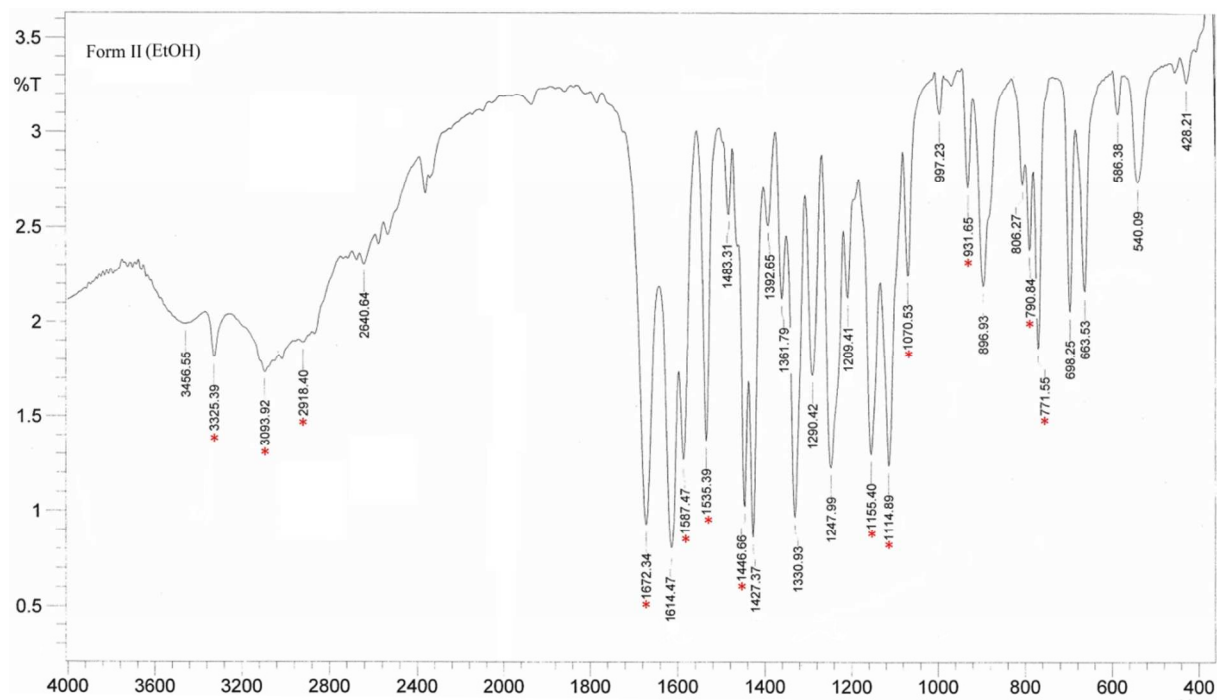

(b)

**Figure S5.** IR spectra of niflumic acid (a) form I obtained from MeOH and (b) form II obtained from EtOH by FE method. The representative peaks that distinguish new form II, from the known form I, are marked with ‘\*’.
